# Supplementary material
Source: MDPI journal article supplement (https://www.mdpi.com/2674-1024/2/1/12)
Supplement: s1 [file s1]

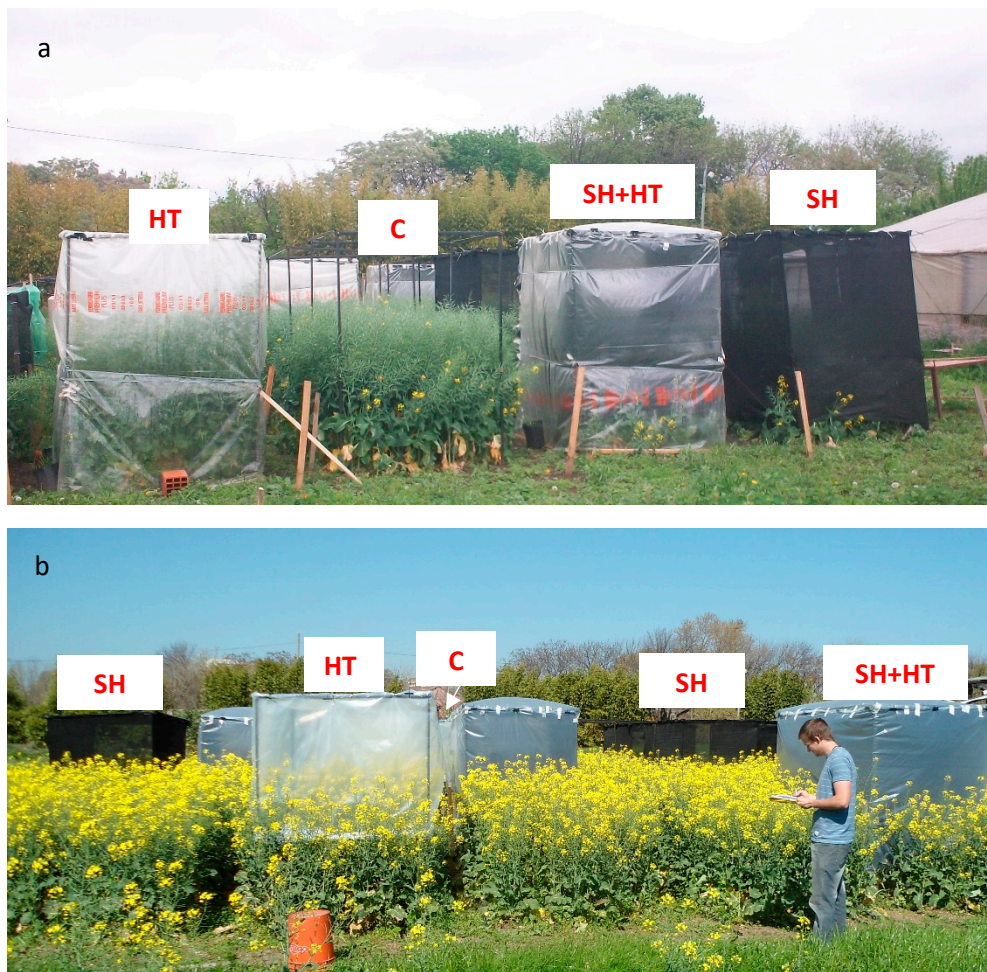

**Figure S1.** General view of the chambers placed on individual plots in Control (C), shading (SH), high temperature (HT), and combined stresses (SH+HT) in Exp. 1 (a) and Exp. 2 (b).

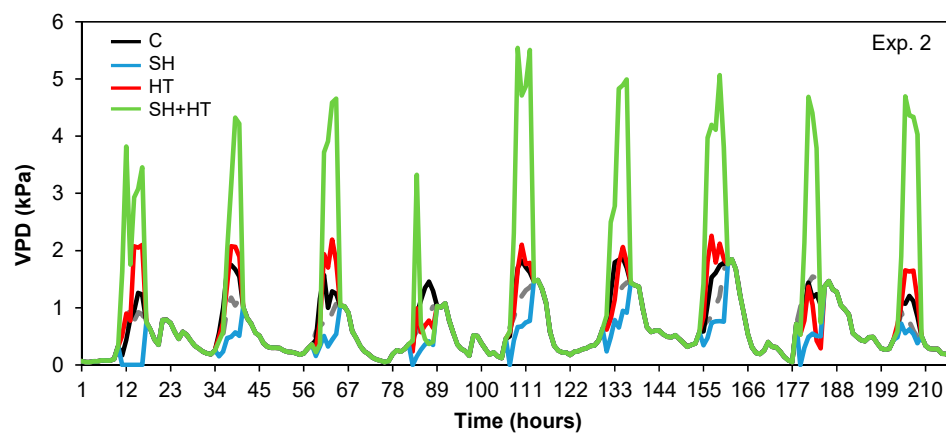

**Figure S2.** Dynamics of vapour pressure deficit (VPD) inside the chambers during treatments in Control (C), shading (SH), high temperature (HT), and combined stresses (SH+HT) in Exp. 2.
